# Supplementary material
Source: publisher site journal article supplement (https://www.dovepress.com/article/399688)
Supplement: Supplementary file 1 [file get_supplementary_file.php]

**Supplementary materials**

**
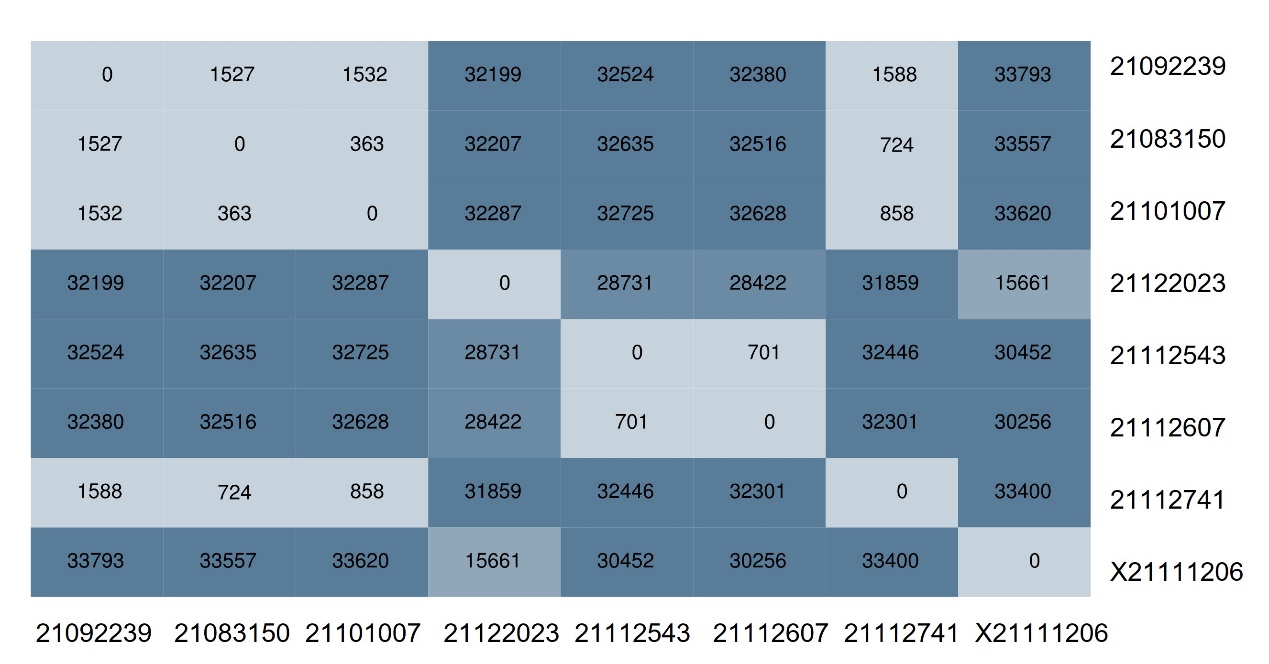
**

**Figure S1.** Heatmap of SNP distribution of eight isolates

Heatmap of SNP distribution of eight isolates drawn using BacWGSTdb43, with colors deepening as SNPs increase.

**
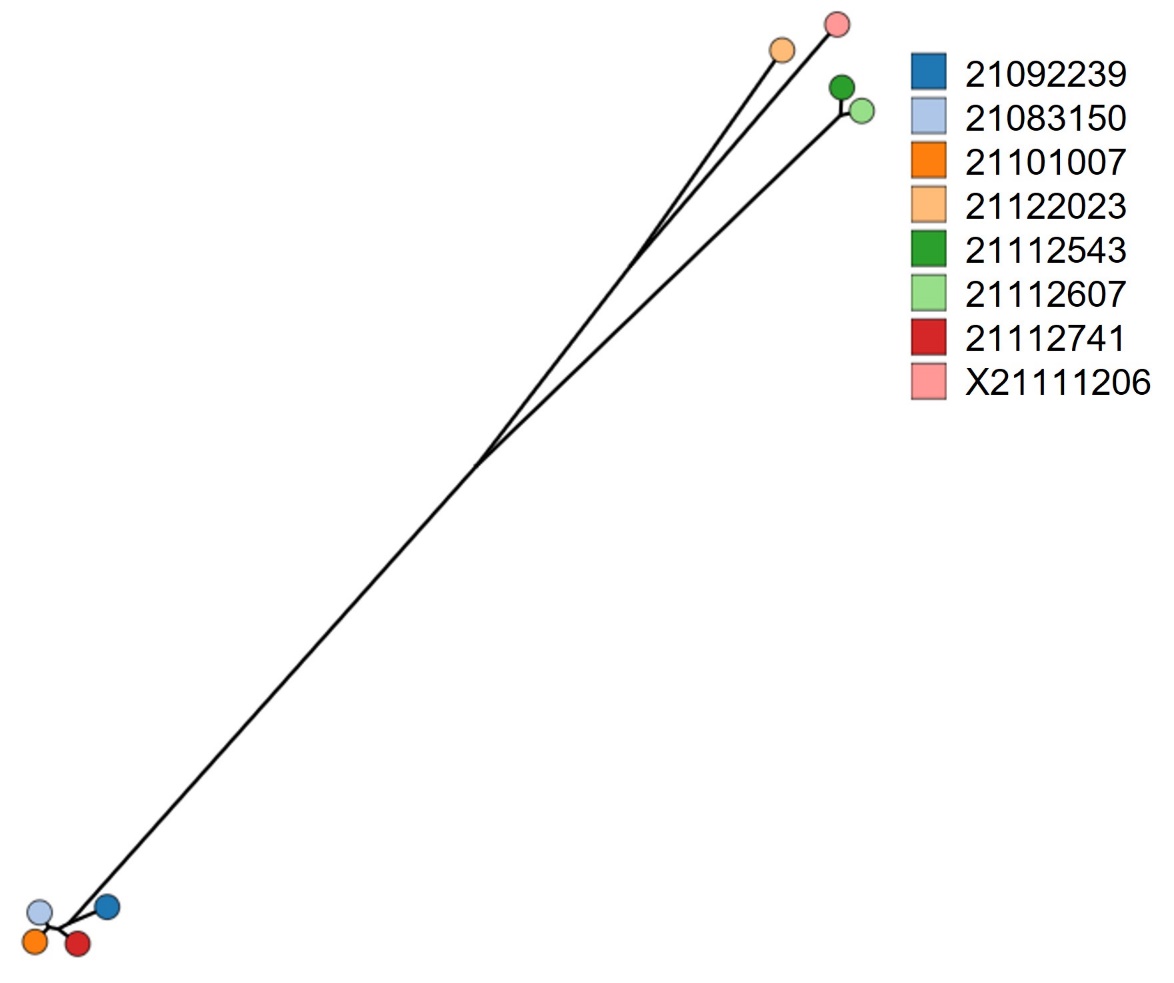
**

**Figure S2.** Relatives of eight isolates based on SNP distances

The eight isolates were divided into three subgroups


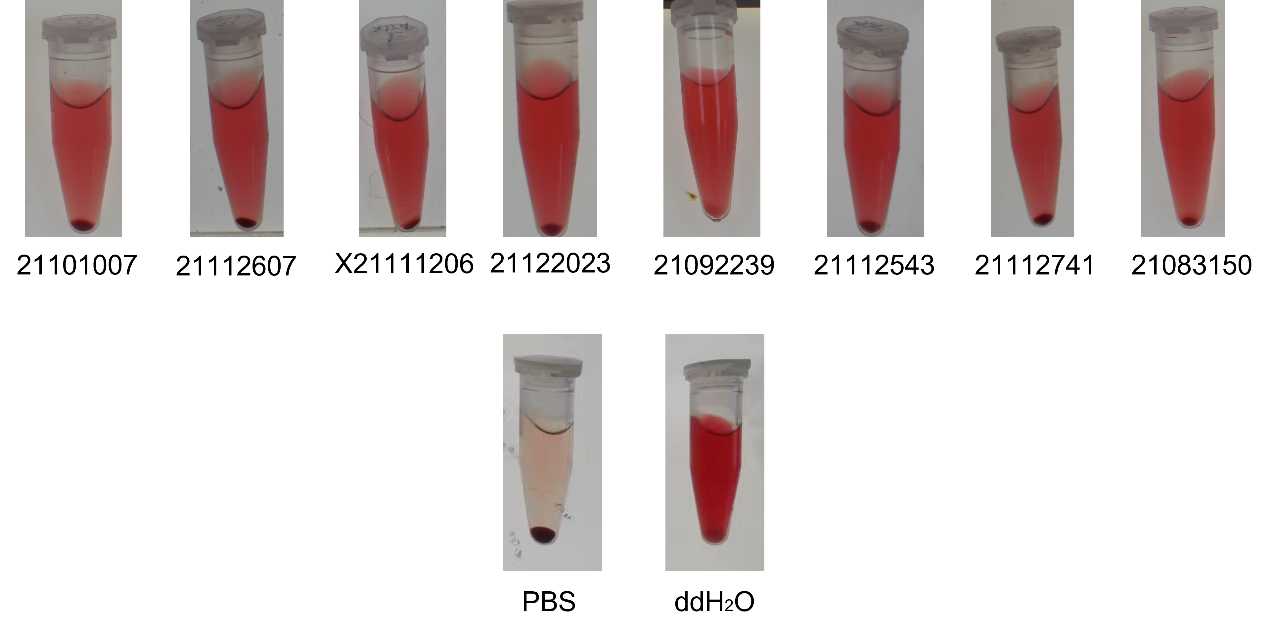


**Figure S3.** Hemolytic phenotype of eight isolates. PBS is negative control, and ddH2O is positive control.
